# Supplementary material for: Varied Responses to a High m.3243A>G Mutation Load and Respiratory Chain Dysfunction in Patient-Derived Cardiomyocytes
Source: MDPI journal article supplement (doi:10.3390/cells11162593), 2022-08-19
Supplement: s1 [file s1]

Supplementary material

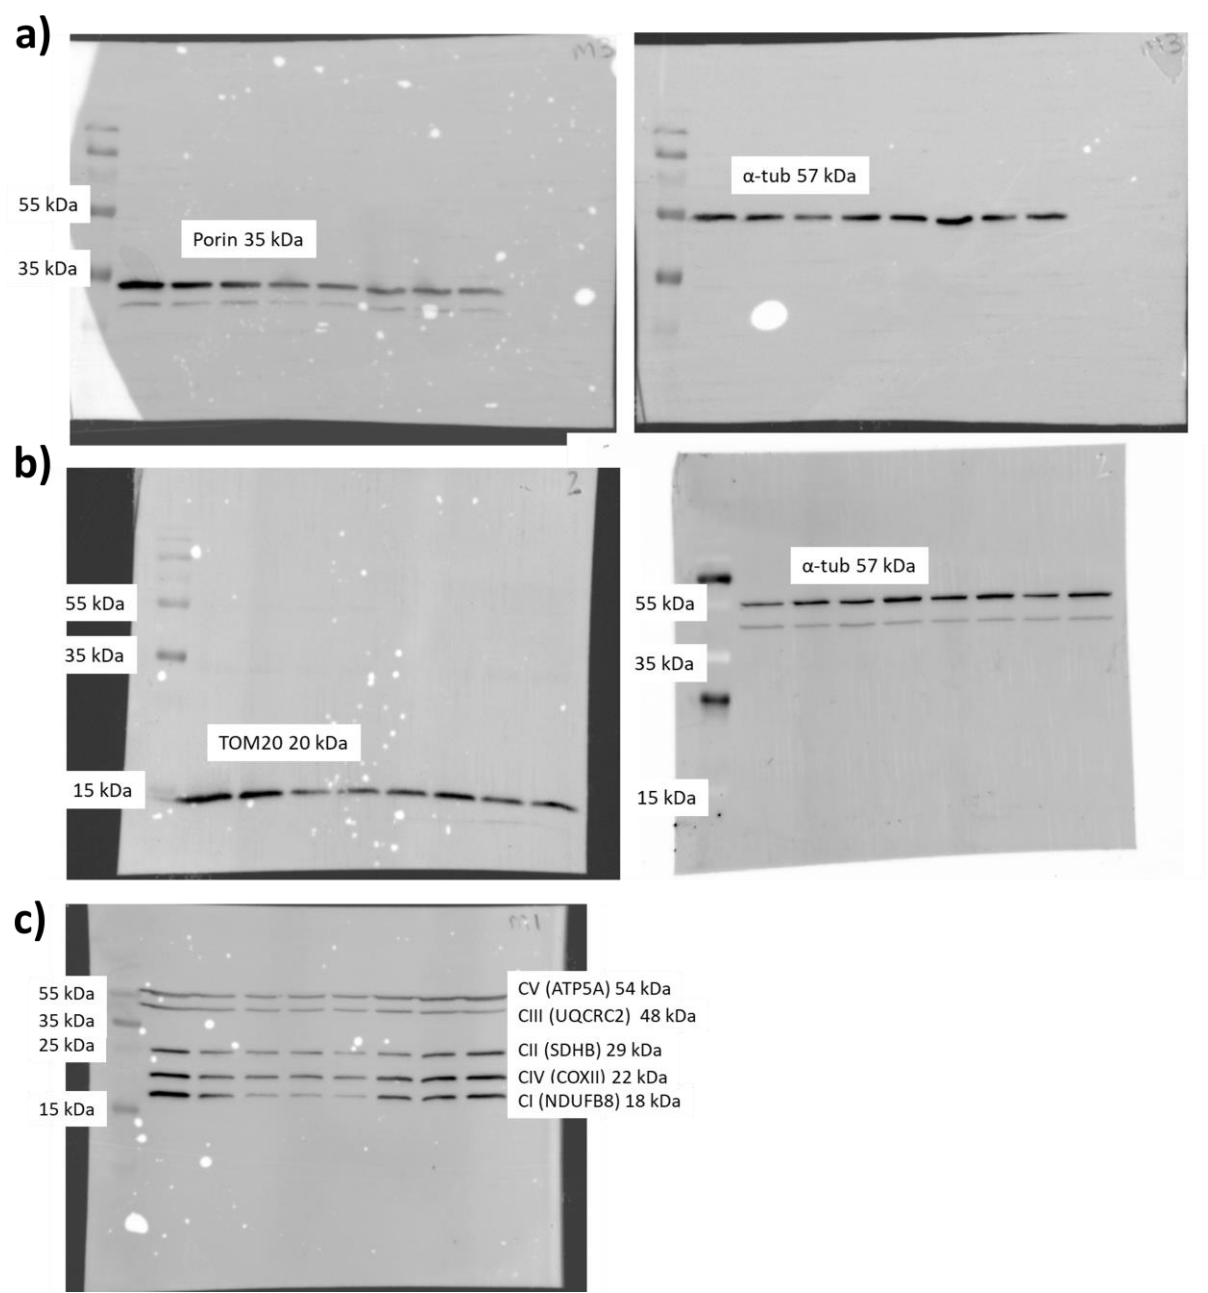

**Figure S1.** Uncropped Western blots (representative images). a) Porin (left) and  $\alpha$ -tubulin (right) in the same blot . b) TOM20 (left) and  $\alpha$ -tubulin (right) in the same blot. c) Total OxPhos Human wb antibody (CI-CV). Molecular weight marker: PageRuler Plus Prestained Protein ladder (Thermo Scientific, #26619).
